# Supplementary material
Source: Springer Nature journal article supplement (https://www.springermedizin.de/resource/supplementary/12888_2010_818_MOESM4_ESM.pdf/9478900)

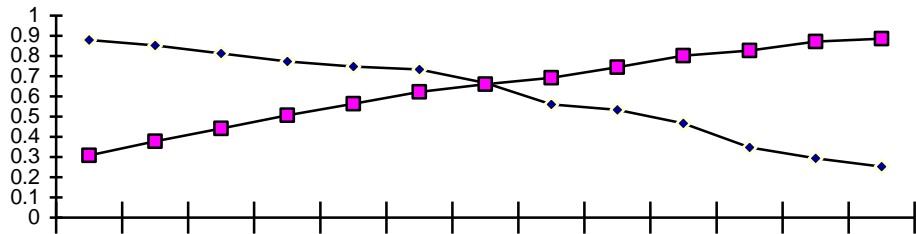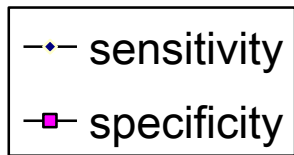

8 9 10 11 12 13 14 15 16 17 18 19 20

Scores of HCL-32

Supplement: MOESM4 [file 9478900]
